# Supplementary material for: Lymphocyte may be a reference index of the outcome of cancer patients with COVID-19
Source: publisher site journal article supplement (doi:10.18632/aging.202741), 2021-03-18
Supplement: Supplementary file [file aging-v13i6-202741-supplementary-material-SD1.pdf]

SUPPLEMENTARY FIGURE

A

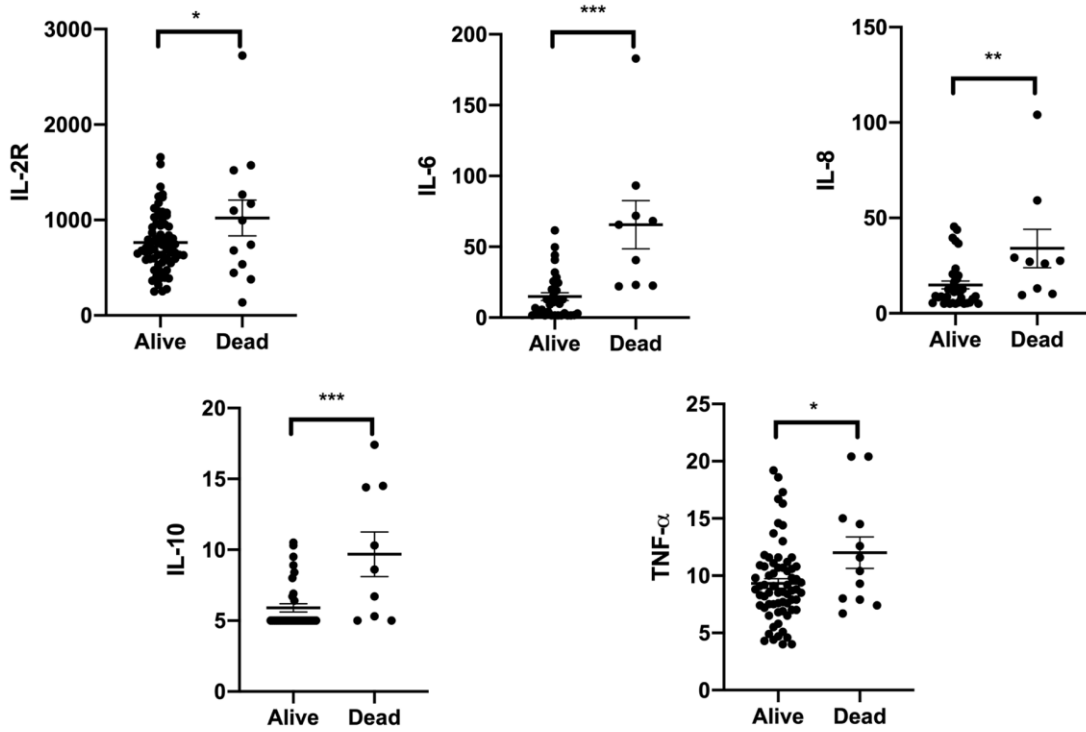

B

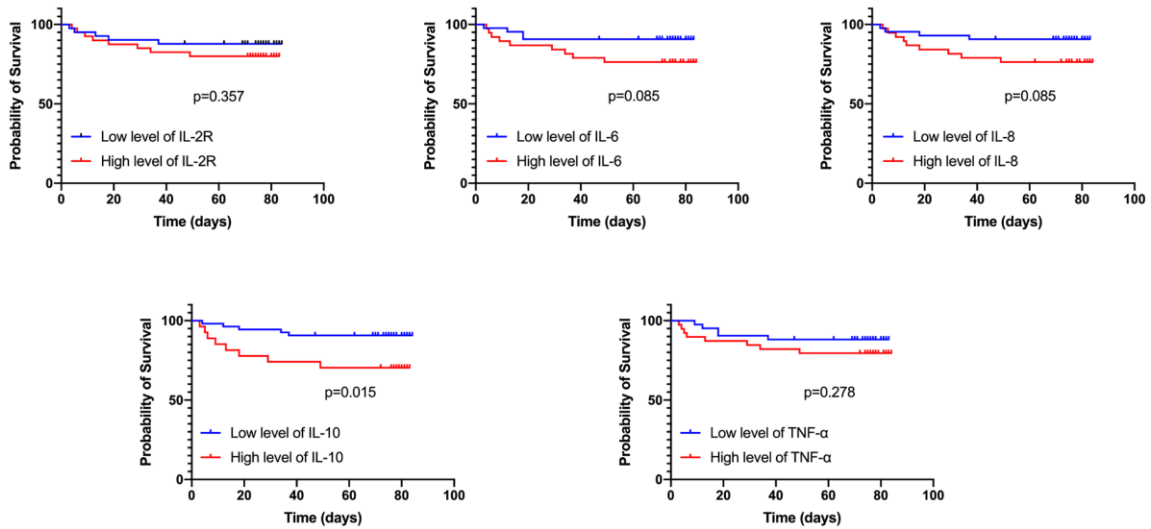

**Supplementary Figure 1. Serum cytokines on admission of non-cancer patients with COVID-19.** Levels of TNF- $\alpha$ , IL-2R, IL-6, IL-8, and IL-10 were increased in non-cancer patients who died of COVID-19 (A). The association between cytokines with survival time in non-cancer patients with COVID-19 (B).
